# Supplementary material for: Core Promoter Regions of Antisense and Long Intergenic Non-Coding RNAs
Source: MDPI journal article supplement (doi:10.3390/ijms24098199), 2023-05-03
Supplement: s1 [file s1]

**Table S8.**Frequencies of occurrence of octanucleotides in the positions (-28 : -21) of the samples obtained imposing the condition “*restricting the selection to promoters that contain a TATA box*”.

|    | <i>M. musculus</i> (-28 : -21) |       | <i>H. sapiens</i> (-28 : -21) |       |
|----|--------------------------------|-------|-------------------------------|-------|
| 1  | ATATAAGG                       | 1.61% | ATAAAAGC                      | 6.40% |
| 2  | TAAAAGGA                       | 0.96% | TATAAGGG                      | 2.00% |
| 3  | ATAAAGCC                       | 0.96% | TAAAGCTG                      | 1.20% |
| 4  | AAAAGGAA                       | 0.96% | TTTATAAG                      | 1.20% |
| 5  | AAAAAGCT                       | 0.64% | ATAAAAGA                      | 1.20% |
| 6  | AAAGAGGG                       | 0.64% | TTAAAAGT                      | 1.20% |
| 7  | TAAAAGAG                       | 0.64% | TATATAAA                      | 0.80% |
| 8  | AAAACCCA                       | 0.64% | TAAAAGGG                      | 0.80% |
| 9  | AAAAGCCA                       | 0.64% | TAAAAACT                      | 0.80% |
| 10 | TAAAGCTA                       | 0.64% | TATGATCA                      | 0.80% |
| 11 | ATTTAAGC                       | 0.64% | AAAAGAAA                      | 0.80% |
| 12 | AAAAAGGA                       | 0.64% | ATAAAGGG                      | 0.80% |
| 13 | ATAAAGTG                       | 0.64% | TAAAAGGA                      | 0.80% |
| 14 | TAAAACCA                       | 0.64% | ATAAAAAC                      | 0.80% |
| 15 | TAAGAGGA                       | 0.64% | TAAAAACC                      | 0.80% |
| 16 | TAAATTGC                       | 0.64% | ACAAAGGC                      | 0.80% |
| 17 | AAAAGGGG                       | 0.64% | TTAAAGGG                      | 0.80% |
| 18 | TAAAACTC                       | 0.64% | TATTTAAA                      | 0.40% |
| 19 | ATAAGAGG                       | 0.64% | AAAAATCT                      | 0.40% |
| 20 | ATTAATAG                       | 0.64% | TATATAGA                      | 0.40% |
