# Supplementary material for: Core Promoter Regions of Antisense and Long Intergenic Non-Coding RNAs
Source: MDPI journal article supplement (doi:10.3390/ijms24098199), 2023-05-03
Supplement: s1 [file s1]

**Table S1.** Frequencies of occurrence of different octanucleotides in the positions (-32 : -25) of the full samples of *M. musculus* and *H. sapiens*.

|    | <i>M. musculus</i> (-32 : -25) |       | <i>H. sapiens</i> (-32 : -25) |       |
|----|--------------------------------|-------|-------------------------------|-------|
| 1  | TTTTTTTT                       | 0.32% | GGTTTATC                      | 0.43% |
| 2  | AAATAAAA                       | 0.16% | GAGAATAA                      | 0.34% |
| 3  | CTATAAAA                       | 0.16% | GTTTTATA                      | 0.26% |
| 4  | GACAATAT                       | 0.16% | CTTTGTTT                      | 0.21% |
| 5  | CTAGTTAT                       | 0.13% | CCTATAAA                      | 0.21% |
| 6  | CTATATAA                       | 0.13% | TCTATAAA                      | 0.17% |
| 7  | GGTTCATA                       | 0.13% | GGGGCGGG                      | 0.17% |
| 8  | GTTTAAAA                       | 0.10% | TTATATAA                      | 0.17% |
| 9  | CTATTTAT                       | 0.10% | CGCGCCCC                      | 0.13% |
| 10 | CCTCCCCA                       | 0.10% | GGGAGAGA                      | 0.13% |
| 11 | TATATAAG                       | 0.10% | GCTTTTCT                      | 0.13% |
| 12 | CCCGGCCC                       | 0.10% | ATTCAAAA                      | 0.13% |
| 13 | CCTATAAA                       | 0.10% | GCCCCGCC                      | 0.13% |
| 14 | AGGAGAAA                       | 0.10% | CTCCCTTC                      | 0.13% |
| 15 | GGGGCGAG                       | 0.10% | CTCTTAAA                      | 0.13% |
| 16 | CCGCCGCC                       | 0.10% | CTATAAAA                      | 0.13% |
| 17 | CTTTAAAA                       | 0.10% | GCCATGCA                      | 0.13% |
| 18 | GTATAAAT                       | 0.10% | GGTTGAGG                      | 0.13% |
| 19 | AGTCATAA                       | 0.10% | GGGATCTG                      | 0.13% |
| 20 | CCTCTCCC                       | 0.10% | TATAAAAA                      | 0.13% |
