# Supplementary material for: Core Promoter Regions of Antisense and Long Intergenic Non-Coding RNAs
Source: MDPI journal article supplement (doi:10.3390/ijms24098199), 2023-05-03
Supplement: s1 [file s1]

**Table S4.**Frequencies of occurrence of octanucleotides in the positions (-30 : -23) of the samples obtained imposing the condition “*restricting the selection to promoters that contain a TATA box*”.

|    | <i>M. musculus</i> (-30 : -23) |       | <i>H. sapiens</i> (-30 : -23) |       |
|----|--------------------------------|-------|-------------------------------|-------|
| 1  | TATAAAAG                       | 1.61% | GAATAAAA                      | 4.00% |
| 2  | CAATATAA                       | 1.61% | TTTATAAG                      | 2.00% |
| 3  | TAAAAAGC                       | 1.29% | ATAAAAGC                      | 2.00% |
| 4  | TATATAAG                       | 1.29% | ATATAAAG                      | 1.60% |
| 5  | TATAAAAA                       | 0.96% | CTTAAAAG                      | 1.20% |
| 6  | ATAAAACC                       | 0.96% | TATAAAGC                      | 1.20% |
| 7  | ATAAAAAG                       | 0.96% | TTTAAAAG                      | 1.20% |
| 8  | ATAAAAGG                       | 0.96% | AAATAAAA                      | 1.20% |
| 9  | ATAAAAAC                       | 0.96% | ATTTAAAA                      | 1.20% |
| 10 | ATAAAAGC                       | 0.96% | ATTTATAA                      | 0.80% |
| 11 | TTAAAAGC                       | 0.64% | ATATAAGG                      | 0.80% |
| 12 | TTAAAGAG                       | 0.64% | TATAAAAC                      | 0.80% |
| 13 | TATTTAGT                       | 0.64% | TTTAAATC                      | 0.80% |
| 14 | TATAAATT                       | 0.64% | AATAAAAA                      | 0.80% |
| 15 | GATAAAAC                       | 0.64% | TTTATATC                      | 0.80% |
| 16 | ATAAAATG                       | 0.64% | GTATAAAA                      | 0.80% |
| 17 | CATAAATA                       | 0.64% | TATATGAT                      | 0.80% |
| 18 | AATAAAAG                       | 0.64% | TTTATAAA                      | 0.80% |
| 19 | AATAAATG                       | 0.64% | ACATAAAA                      | 0.80% |
| 20 | TTATAAAG                       | 0.64% | AAATAGAA                      | 0.80% |
