# Supplementary material for: Core Promoter Regions of Antisense and Long Intergenic Non-Coding RNAs
Source: MDPI journal article supplement (doi:10.3390/ijms24098199), 2023-05-03
Supplement: s1 [file s1]

**Table S9.** Frequencies of occurrence of dinucleotides in the (-2, +2) positions of INR.

| <i>M. musculus</i> |       | <i>H. sapiens</i> |       |
|--------------------|-------|-------------------|-------|
| TCAG               | 7.99% | TCAG              | 5.81% |
| CCAG               | 7.51% | CCAG              | 5.52% |
| GCAG               | 5.26% | GCAG              | 3.85% |
| TCAC               | 4.29% | TCAC              | 3.33% |
| CCAC               | 3.18% | CCAC              | 3.25% |
| ACAG               | 2.89% | CTGG              | 2.74% |
| TTAG               | 2.76% | ACAG              | 2.22% |
| CCAT               | 1.95% | TCAT              | 2.09% |
| GCAC               | 1.95% | CTGA              | 2.09% |
| CTGA               | 1.92% | GCGG              | 2.09% |
| CTGT               | 1.85% | CCGG              | 2.05% |
| TTGT               | 1.75% | TTGG              | 2.01% |
| TCAT               | 1.66% | CTGT              | 1.92% |
| TTCT               | 1.56% | CCGC              | 1.75% |
| CTGC               | 1.56% | GTGG              | 1.71% |
| CTAG               | 1.53% | TTAG              | 1.67% |
| TCCT               | 1.49% | GCAC              | 1.62% |
| CCGC               | 1.14% | TCCT              | 1.62% |
| TCAA               | 1.14% | CTAG              | 1.58% |
| CTAA               | 1.14% | TTGT              | 1.50% |
