# Supplementary material for: Core Promoter Regions of Antisense and Long Intergenic Non-Coding RNAs
Source: MDPI journal article supplement (doi:10.3390/ijms24098199), 2023-05-03
Supplement: s1 [file s1]

**Table S6.** Frequencies of occurrence of octanucleotides in the positions (-29 : -22) of the samples obtained imposing the condition “*restricting the selection to promoters that contain a TATA box*”.

|    | <i>M. musculus</i> (-29 : -22) |       | <i>H. sapiens</i> (-29 : -22) |       |
|----|--------------------------------|-------|-------------------------------|-------|
| 1  | AATATAAG                       | 1.61% | AATAAAAG                      | 6.00% |
| 2  | TAAAACCC                       | 1.29% | TTATAAGG                      | 2.40% |
| 3  | ATAAAAGG                       | 0.96% | TTAAAAGG                      | 1.20% |
| 4  | ATAAAAGA                       | 0.96% | ATAAAGCT                      | 1.20% |
| 5  | TAAAAACC                       | 0.96% | ATAAAAAC                      | 1.20% |
| 6  | ATAAATAG                       | 0.96% | TTTAAAAG                      | 1.20% |
| 7  | ATAAAATG                       | 0.96% | TATAAAGC                      | 1.20% |
| 8  | ATAAAAAG                       | 0.96% | ATTTAAGA                      | 0.80% |
| 9  | TAAAGAGG                       | 0.96% | CTTTATAA                      | 0.80% |
| 10 | TAAAAAGG                       | 0.96% | TTATATCC                      | 0.80% |
| 11 | TATAAAGC                       | 0.96% | ATAAATAC                      | 0.80% |
| 12 | TAAAAGGA                       | 0.96% | TAAAACCC                      | 0.80% |
| 13 | ATAAAAGC                       | 0.96% | ATATGATC                      | 0.80% |
| 14 | TAAAAGCA                       | 0.96% | TTTAAAAA                      | 0.80% |
| 15 | TTAAAAAC                       | 0.64% | AGAAAAGG                      | 0.80% |
| 16 | AAAAAGCC                       | 0.64% | TTAAAAGC                      | 0.80% |
| 17 | ATAAATTG                       | 0.64% | TAAAAGCA                      | 0.80% |
| 18 | TATTTAAG                       | 0.64% | TATAAAAG                      | 0.80% |
| 19 | TATAAAGT                       | 0.64% | TTATAAAG                      | 0.80% |
| 20 | ATAAAACC                       | 0.64% | CATAAAAG                      | 0.80% |
