# Supplementary material for: Core Promoter Regions of Antisense and Long Intergenic Non-Coding RNAs
Source: MDPI journal article supplement (doi:10.3390/ijms24098199), 2023-05-03
Supplement: s1 [file s1]

**Table S5.** Frequencies of occurrence of different octanucleotides in the positions (-29 : -22) of the full samples of *M. musculus* and *H. sapiens*.

|    | <i>M. musculus</i> (-29 : -22) |       | <i>H. sapiens</i> (-29 : -22) |       |
|----|--------------------------------|-------|-------------------------------|-------|
| 1  | TTTTTTTT                       | 0.45% | AATAAAAG                      | 0.64% |
| 2  | AATATAAG                       | 0.16% | TTATAAGG                      | 0.26% |
| 3  | GAGAGAGA                       | 0.13% | TTATCAGG                      | 0.26% |
| 4  | GTTATGTT                       | 0.13% | TGTTTACC                      | 0.21% |
| 5  | TAAAACCC                       | 0.13% | ATAAAAAC                      | 0.13% |
| 6  | GGTAAAGT                       | 0.13% | GGCGGGGC                      | 0.13% |
| 7  | AAGATCCT                       | 0.10% | CCTCTCCC                      | 0.13% |
| 8  | TAAAAACC                       | 0.10% | CGTCCCGC                      | 0.13% |
| 9  | TTGTTTTT                       | 0.10% | CCGCCCCC                      | 0.13% |
| 10 | GGCGTGGC                       | 0.10% | GGAAGAGG                      | 0.13% |
| 11 | TAAAGAGG                       | 0.10% | CCTCCTCC                      | 0.13% |
| 12 | ATAAAAAG                       | 0.10% | TAAAAGCT                      | 0.13% |
| 13 | CCCCGCCC                       | 0.10% | ATGCAGGG                      | 0.13% |
| 14 | TAAAAGCA                       | 0.10% | CTTGGCCA                      | 0.13% |
| 15 | TATAAAGC                       | 0.10% | TTAAAAGG                      | 0.13% |
| 16 | GGGAGGGG                       | 0.10% | ATTTTTTT                      | 0.13% |
| 17 | ATAAAAGA                       | 0.10% | GCTAATAA                      | 0.13% |
| 18 | ATAAAAGG                       | 0.10% | TGAGGTGG                      | 0.13% |
| 19 | CTGCCCGC                       | 0.10% | TATAAAGC                      | 0.13% |
| 20 | AGAAAAGG                       | 0.10% | TTATCAAG                      | 0.13% |
