# Supplementary material for: Core Promoter Regions of Antisense and Long Intergenic Non-Coding RNAs
Source: MDPI journal article supplement (doi:10.3390/ijms24098199), 2023-05-03
Supplement: s1 [file s1]

**Table S2.**Frequencies of occurrence (in percent's) of octanucleotides in the positions (-32 : -25) of the samples obtained imposing the condition “*restricting the selection to promoters that contain a TATA box*”.

|    | <i>M. musculus</i> (-32 : -25) |       | <i>H. sapiens</i> (-32 : -25) |       |
|----|--------------------------------|-------|-------------------------------|-------|
| 1  | GACAATAT                       | 1.61% | GAGAATAA                      | 3.20% |
| *2 | CTATAAAA                       | 1.61% | GTTTTATA                      | 2.40% |
| 3  | AAATAAAA                       | 1.61% | CCTATAAA                      | 2.00% |
| 4  | CTATATAA                       | 1.29% | TTATATAA                      | 1.60% |
| 5  | CCTATAAA                       | 0.96% | TCTATAAA                      | 1.60% |
| 6  | GTTTAAAA                       | 0.96% | CTTTAAAA                      | 1.20% |
| 7  | TATAAAAG                       | 0.96% | TATAAAAA                      | 1.20% |
| 8  | CTTAAAAG                       | 0.96% | CTATAAAA                      | 1.20% |
| 9  | CTATTTAT                       | 0.96% | CCAATAAA                      | 0.80% |
| 10 | GTATAAAT                       | 0.96% | ATAAATAG                      | 0.80% |
| 11 | CTTTAAAA                       | 0.96% | CCCTTAAA                      | 0.80% |
| 12 | TATATAAG                       | 0.96% | GTATTTAT                      | 0.80% |
| 13 | GTATAAAA                       | 0.96% | CTTATAAA                      | 0.80% |
| 14 | CAAATAAA                       | 0.64% | GAATAAAT                      | 0.80% |
| 15 | TATATAAA                       | 0.64% | ATAAAGAC                      | 0.80% |
| 16 | GCTATAAA                       | 0.64% | TTACAAAA                      | 0.80% |
| 17 | GCCATAAA                       | 0.64% | TATAAATT                      | 0.80% |
| 18 | AGATAAAA                       | 0.64% | GCTTTAAA                      | 0.80% |
| 19 | GGTATAAA                       | 0.64% | TTTTAAAA                      | 0.80% |
| 20 | GCTATTTA                       | 0.64% | CTTAAAGG                      | 0.80% |
