# Supplementary material for: Core Promoter Regions of Antisense and Long Intergenic Non-Coding RNAs
Source: MDPI journal article supplement (doi:10.3390/ijms24098199), 2023-05-03
Supplement: s1 [file s1]

**Table S7.** Frequencies of occurrence of different octanucleotides in the positions (-28 : -21) of the full samples of *M. musculus* and *H. sapiens*.

|    | <i>M. musculus</i> (-28 : -21) |       | <i>H. sapiens</i> (-28 : -21) |       |
|----|--------------------------------|-------|-------------------------------|-------|
| 1  | TTTTTTTT                       | 0.45% | ATAAAAGC                      | 0.68% |
| 2  | ATATAAGG                       | 0.16% | TTTTTTTT                      | 0.26% |
| 3  | AGATCCTC                       | 0.13% | TATAAGGG                      | 0.21% |
| 4  | TTATGTTC                       | 0.13% | TATCAGGG                      | 0.21% |
| 5  | ATTAATAG                       | 0.10% | GTTTACCT                      | 0.21% |
| 6  | GGGGGTGG                       | 0.10% | GGCGCGGG                      | 0.13% |
| 7  | TAAAAGGA                       | 0.10% | GAGAGGGA                      | 0.13% |
| 8  | CAAAACCC                       | 0.10% | GGGGCGGG                      | 0.13% |
| 9  | ATAAAGCC                       | 0.10% | AAAAGAAA                      | 0.13% |
| 10 | CTGAGCTC                       | 0.10% | GGAGGGAG                      | 0.13% |
| 11 | CCAGGAGG                       | 0.10% | GGAAGCGC                      | 0.13% |
| 12 | GAAAAGGA                       | 0.10% | TTTATAAG                      | 0.13% |
| 13 | AAAAGGAA                       | 0.10% | TGCAGGGC                      | 0.13% |
| 14 | TGAAGGGA                       | 0.10% | CTTGAGCT                      | 0.13% |
| 15 | AAAAGCCA                       | 0.10% | TTGGCCAG                      | 0.13% |
| 16 | TAAATACC                       | 0.10% | ATAAAAGA                      | 0.13% |
| 17 | TAAGAGGA                       | 0.10% | TAAAAGGA                      | 0.13% |
| 18 | AAAACCCC                       | 0.10% | CTAATAAT                      | 0.13% |
| 19 | GGGAGGGG                       | 0.10% | CCTCCCCC                      | 0.13% |
| 20 | TTAGGAGG                       | 0.10% | TTAAAAGT                      | 0.13% |
