# Supplementary material for: Core Promoter Regions of Antisense and Long Intergenic Non-Coding RNAs
Source: MDPI journal article supplement (doi:10.3390/ijms24098199), 2023-05-03
Supplement: s1 [file s1]

**Table S3.** Frequencies of occurrence of different octanucleotides in the positions (-30 : -23) of the full samples of *M. musculus* and *H. sapiens*.

|    | <i>M. musculus</i> (-30 : -23) |       | <i>H. sapiens</i> (-30 : -23) |       |
|----|--------------------------------|-------|-------------------------------|-------|
| 1  | TTTTTTTT                       | 0.39% | ACAATATA                      | 1.61% |
| 2  | TATAAAAG                       | 0.16% | CTATAAAA                      | 1.29% |
| 3  | CAATATAA                       | 0.16% | GTATAAAA                      | 1.29% |
| 4  | AGTTATGT                       | 0.13% | TTTAAAAG                      | 1.29% |
| 5  | TATATAAG                       | 0.13% | AATAAAAG                      | 1.29% |
| 6  | TAAAAAGC                       | 0.13% | CTATTTAG                      | 0.96% |
| 7  | TAAGATCC                       | 0.10% | TATAAATA                      | 0.96% |
| 8  | AGAGAGAG                       | 0.10% | TTTAAAAC                      | 0.96% |
| 9  | TCCTTTTT                       | 0.10% | TATATAAG                      | 0.96% |
| 10 | TATAAAAA                       | 0.10% | AATAAAAA                      | 0.96% |
| 11 | ATAAAAGG                       | 0.10% | TATTTATT                      | 0.96% |
| 12 | GCCCCGCC                       | 0.10% | GTATATAA                      | 0.96% |
| 13 | ATAAAAAC                       | 0.10% | AAATAAAT                      | 0.96% |
| 14 | ATAAAAGC                       | 0.10% | ATATAAGG                      | 0.96% |
| 15 | GAAGTGGA                       | 0.10% | TATAAAAG                      | 0.96% |
| 16 | GGGAGGGG                       | 0.10% | TTAAAAG                       | 0.64% |
| 17 | AAAAAAAA                       | 0.10% | CTTAAAGA                      | 0.64% |
| 18 | AATAAGGA                       | 0.10% | TATAATAG                      | 0.64% |
| 19 | CTGCTTCC                       | 0.10% | ATAAAAAG                      | 0.64% |
| 20 | ATAAAACC                       | 0.10% | CTATAAAT                      | 0.64% |
