# Supplementary material for: Core Promoter Regions of Antisense and Long Intergenic Non-Coding RNAs
Source: Int J Mol Sci. 2023 May 3;24(9):8199. doi: 10.3390/ijms24098199 (PMC10179571; doi:10.3390/ijms24098199)
Supplement: Supplementary file 1 [file ijms-24-08199-s001.zip]

Archive with 12 entries (12 files):
- ijms-2325021-supplementary/Figure S1.tiff
- ijms-2325021-supplementary/Figure S2.tiff
- ijms-2325021-supplementary/Figure S3.tiff
- ijms-2325021-supplementary/Table S1.pdf
- ijms-2325021-supplementary/Table S2.pdf
- ijms-2325021-supplementary/Table S3.pdf
- ijms-2325021-supplementary/Table S4.pdf
- ijms-2325021-supplementary/Table S5.pdf
- ijms-2325021-supplementary/Table S6.pdf
- ijms-2325021-supplementary/Table S8.pdf
- ijms-2325021-supplementary/Table S9.pdf
- ijms-2325021-supplementary/TableS 7.pdf
